# Supplementary material for: Validation of a 1:8 Scale Measurement Stand for Testing Airborne Sound Insulation
Source: MDPI journal article supplement (doi:10.3390/s21196663), 2021-10-07
Supplement: s1 [file s1]

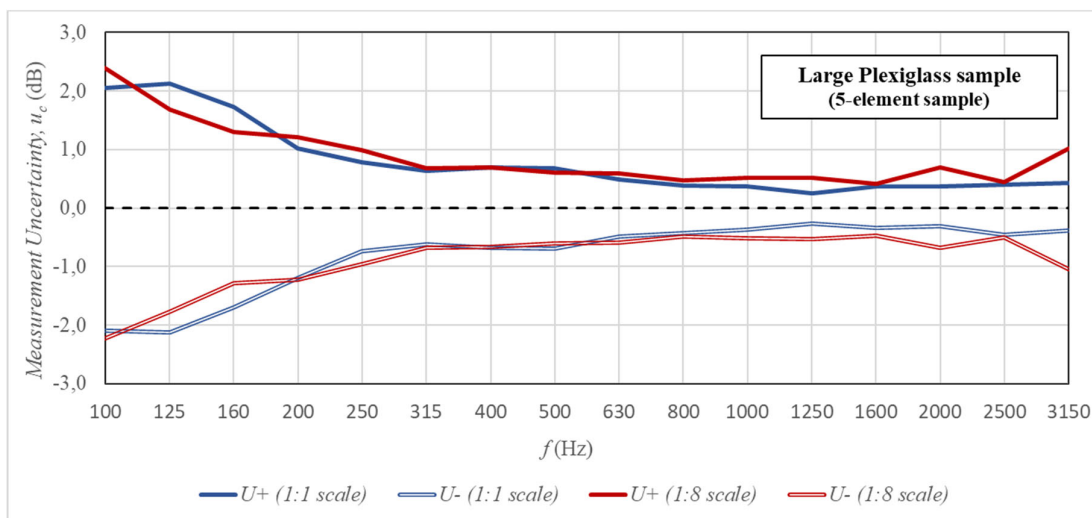

Figure S1. Uncertainty of sound insulation measurement for the 1 x 2 m plexiglass specimen (1:1 scale stand) / 125 x 250 mm (1:8 scale stand) as a function of frequency for the 5-element measurement samples. The results from the scaled rooms were scaled to actual measurement frequencies.

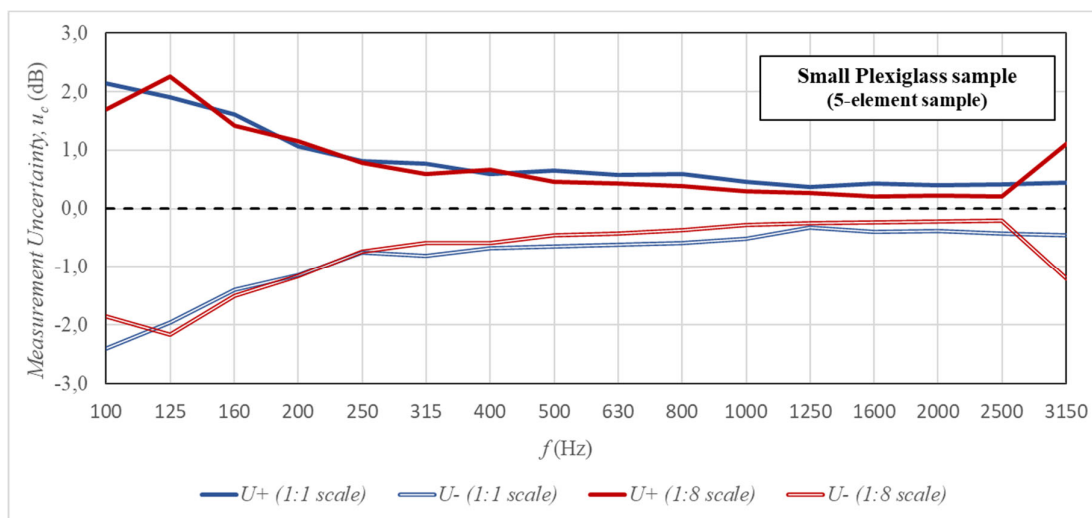

Figure S2. Uncertainty of sound insulation measurement for the 0.7 x 0.7 m plexiglass specimen (1:1 scale stand) / 87.5 x 87.5 mm (1:8 scale stand) as a function of frequency for the 5-element measurement samples. The results from the scaled rooms were scaled to actual measurement frequencies.

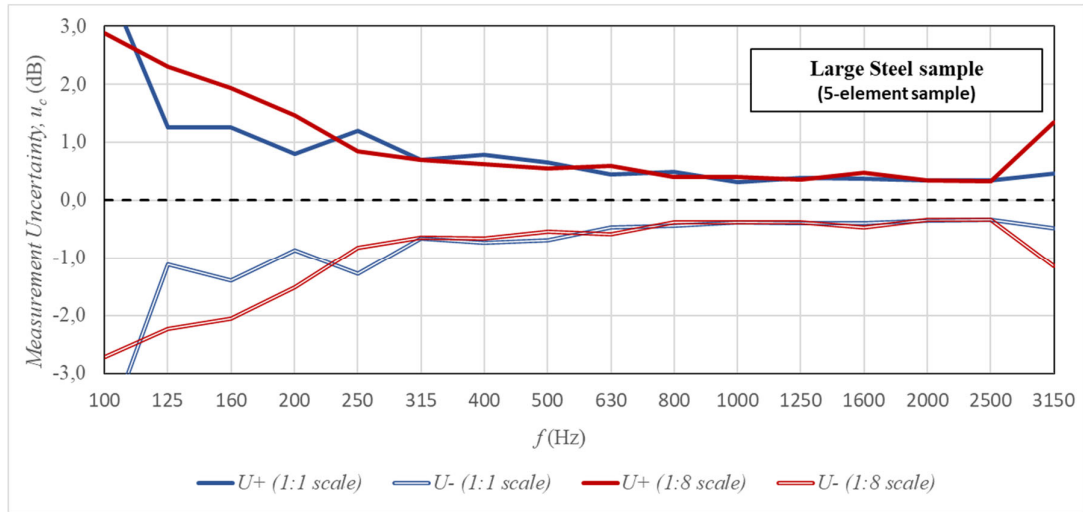

Figure S3. Uncertainty of sound insulation measurement for the 1 x 2 m steel plate specimen (1:1 scale stand) / 125 x 250 mm (1:8 scale stand) as a function of frequency for the 5-element measurement samples. The results from the scaled rooms were scaled to actual measurement frequencies.

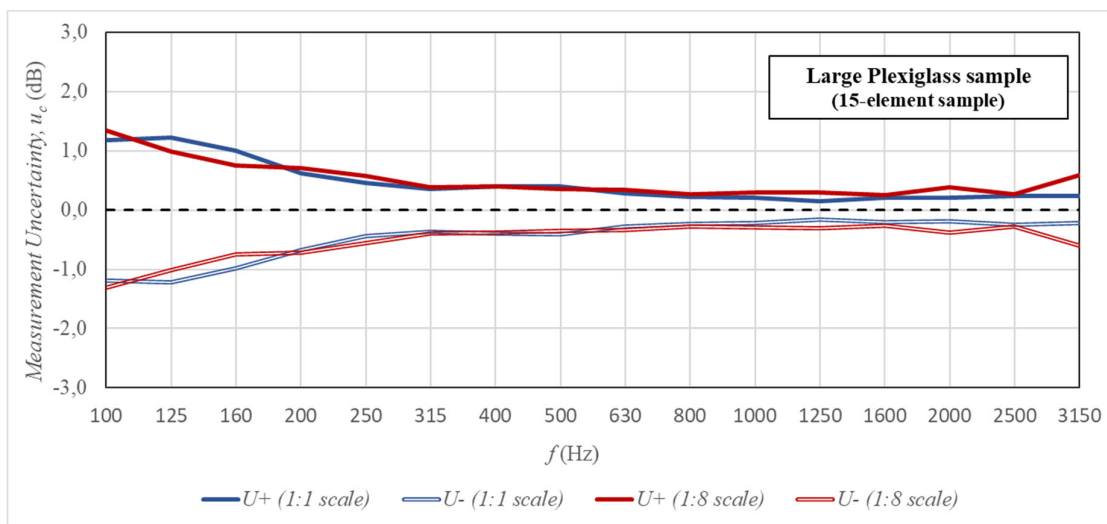

Figure S4. Uncertainty of sound insulation measurement for the 1 x 2 m plexiglass specimen (1:1 scale stand) / 125 x 250 mm (1:8 scale stand) as a function of frequency for the 15-element measurement samples. The results from the scaled rooms were scaled to actual measurement frequencies.

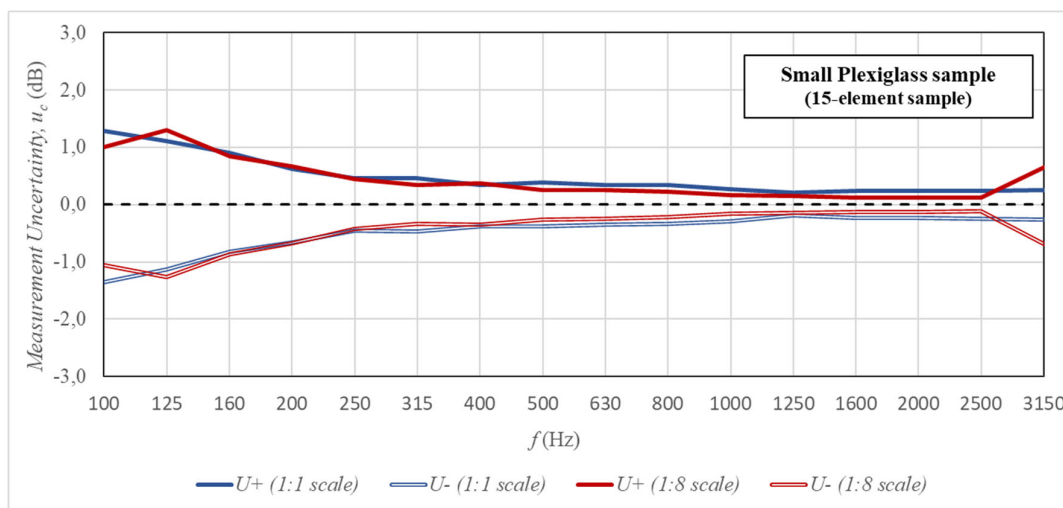

Figure S5. Uncertainty of sound insulation measurement for the 0.7 x 0.7 m plexiglass specimen (1:1 scale stand) / 87.5 x 87.5 mm (1:8 scale stand) as a function of frequency for the 15-element measurement samples. The results from the scaled rooms were scaled to actual measurement frequencies.

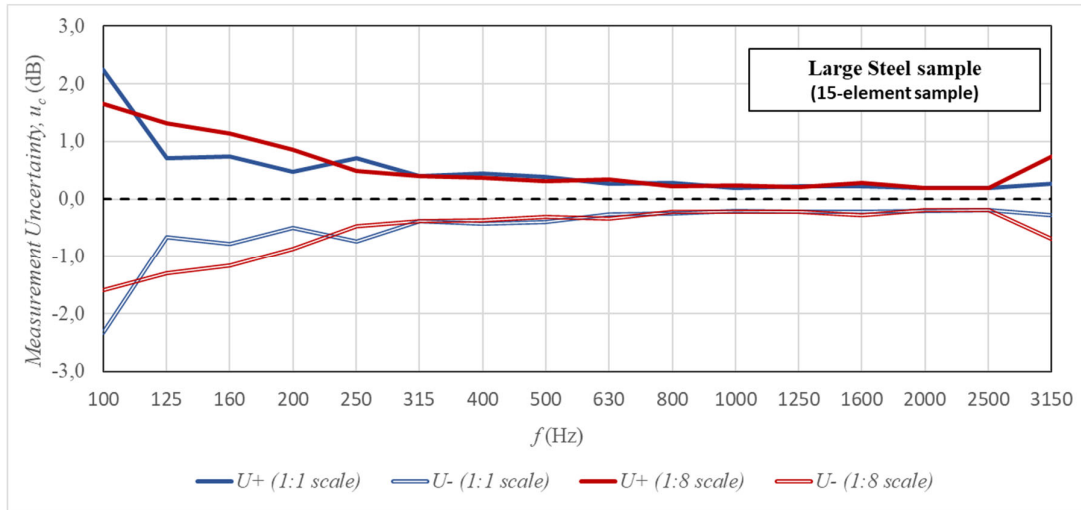

Figure S6. Uncertainty of sound insulation measurement for the 1 x 2 m steel plate specimen (1:1 scale stand) / 125 x 250 mm (1:8 scale stand) as a function of frequency for the 15-element measurement samples. The results from the scaled rooms were scaled to actual measurement frequencies.

Table S1. Uncertainty of sound insulation measurement for all tested specimens for the 5-element measurement samples vs the ISO 12999-1 recommendations [25]. The results from the scaled rooms were scaled to actual measurement frequencies.

| f<br>(Hz) | ISO 12999-1<br>recommendations                                | Greater of the upper and lower uncertainties<br>of sound insulation measurement |                                             |                                           |                                             |                                           |                                             |
|-----------|---------------------------------------------------------------|---------------------------------------------------------------------------------|---------------------------------------------|-------------------------------------------|---------------------------------------------|-------------------------------------------|---------------------------------------------|
|           | Maximum standard<br>deviation / Typical<br>standard deviation | Measurements on the 1:8 stand                                                   |                                             |                                           | Measurements on the 1:1 stand               |                                           |                                             |
|           |                                                               | Plexiglass<br>specimen<br>125 x<br>250 mm                                       | Plexiglass<br>specimen<br>87.5 x<br>87.5 mm | Plexiglass<br>specimen<br>125 x<br>250 mm | Plexiglass<br>specimen<br>87.5 x<br>87.5 mm | Plexiglass<br>specimen<br>125 x<br>250 mm | Plexiglass<br>specimen<br>87.5 x<br>87.5 mm |
| 100       | 2.6 / 1.4                                                     | 2.14                                                                            | 1.86                                        | 2.87                                      | 2.09                                        | 2.40                                      | 4.10                                        |
| 125       | 2.2 / 1.2                                                     | 2.45                                                                            | 2.26                                        | 2.30                                      | 2.13                                        | 1.97                                      | 1.26                                        |
| 160       | 1.9 / 1.0                                                     | 2.16                                                                            | 1.50                                        | 2.05                                      | 1.72                                        | 1.61                                      | 1.39                                        |
| 200       | 1.7 / 0.9                                                     | 1.36                                                                            | 1.16                                        | 1.51                                      | 1.20                                        | 1.14                                      | 0.86                                        |
| 250       | 1.5 / 0.8                                                     | 0.85                                                                            | 0.79                                        | 0.84                                      | 0.79                                        | 0.81                                      | 1.27                                        |
| 315       | 1.4 / 0.7                                                     | 0.79                                                                            | 0.59                                        | 0.69                                      | 0.64                                        | 0.81                                      | 0.69                                        |
| 400       | 1.3 / 0.6                                                     | 0.83                                                                            | 0.66                                        | 0.65                                      | 0.70                                        | 0.67                                      | 0.79                                        |
| 500       | 1.3 / 0.6                                                     | 0.55                                                                            | 0.46                                        | 0.55                                      | 0.70                                        | 0.66                                      | 0.68                                        |
| 630       | 1.3 / 0.6                                                     | 0.50                                                                            | 0.44                                        | 0.59                                      | 0.49                                        | 0.62                                      | 0.47                                        |
| 800       | 1.3 / 0.6                                                     | 0.46                                                                            | 0.39                                        | 0.41                                      | 0.42                                        | 0.59                                      | 0.49                                        |
| 1000      | 1.3 / 0.6                                                     | 0.47                                                                            | 0.30                                        | 0.40                                      | 0.37                                        | 0.51                                      | 0.38                                        |
| 1250      | 1.3 / 0.6                                                     | 0.53                                                                            | 0.27                                        | 0.37                                      | 0.26                                        | 0.37                                      | 0.40                                        |
| 1600      | 1.3 / 0.6                                                     | 0.74                                                                            | 0.23                                        | 0.48                                      | 0.37                                        | 0.44                                      | 0.39                                        |
| 2000      | 1.3 / 0.6                                                     | 0.90                                                                            | 0.22                                        | 0.35                                      | 0.38                                        | 0.41                                      | 0.35                                        |
| 2500      | 1.3 / 0.6                                                     | 1.09                                                                            | 0.20                                        | 0.33                                      | 0.45                                        | 0.42                                      | 0.34                                        |
| 3150      | 1.3 / 0.6                                                     | 1.09                                                                            | 1.20                                        | 1.34                                      | 0.42                                        | 0.46                                      | 0.48                                        |

Table S2. Uncertainty of sound insulation measurement for all tested specimens for the 15-element measurement samples vs the ISO 12999-1 recommendations [25]. The results from the scaled rooms were scaled to actual measurement frequencies.

| f<br>(Hz) | ISO 12999-1<br>recommendations                                | Greater of the upper and lower uncertainties<br>of sound insulation measurement |                                           |                                           |                                           |                                           |                                           |
|-----------|---------------------------------------------------------------|---------------------------------------------------------------------------------|-------------------------------------------|-------------------------------------------|-------------------------------------------|-------------------------------------------|-------------------------------------------|
|           | Maximum standard<br>deviation / Typical<br>standard deviation | Measurements on the 1:8 stand                                                   |                                           |                                           | Measurements on the 1:8 stand             |                                           |                                           |
|           |                                                               | Plexiglass<br>specimen<br>125 x<br>250 mm                                       | Plexiglass<br>specimen<br>125 x<br>250 mm | Plexiglass<br>specimen<br>125 x<br>250 mm | Plexiglass<br>specimen<br>125 x<br>250 mm | Plexiglass<br>specimen<br>125 x<br>250 mm | Plexiglass<br>specimen<br>125 x<br>250 mm |
| 100       | 2.6 / 1.4                                                     | 1.22                                                                            | 1.06                                      | 1.66                                      | 1.19                                      | 1.35                                      | 2.32                                      |
| 125       | 2.2 / 1.2                                                     | 1.40                                                                            | 1.30                                      | 1.31                                      | 1.23                                      | 1.13                                      | 0.71                                      |
| 160       | 1.9 / 1.0                                                     | 1.22                                                                            | 0.86                                      | 1.16                                      | 1.00                                      | 0.90                                      | 0.79                                      |
| 200       | 1.7 / 0.9                                                     | 0.76                                                                            | 0.67                                      | 0.86                                      | 0.67                                      | 0.66                                      | 0.50                                      |
| 250       | 1.5 / 0.8                                                     | 0.49                                                                            | 0.45                                      | 0.48                                      | 0.46                                      | 0.47                                      | 0.73                                      |
| 315       | 1.4 / 0.7                                                     | 0.45                                                                            | 0.34                                      | 0.39                                      | 0.36                                      | 0.47                                      | 0.40                                      |
| 400       | 1.3 / 0.6                                                     | 0.47                                                                            | 0.37                                      | 0.37                                      | 0.40                                      | 0.38                                      | 0.44                                      |
| 500       | 1.3 / 0.6                                                     | 0.32                                                                            | 0.26                                      | 0.31                                      | 0.40                                      | 0.38                                      | 0.39                                      |
| 630       | 1.3 / 0.6                                                     | 0.29                                                                            | 0.25                                      | 0.34                                      | 0.28                                      | 0.36                                      | 0.27                                      |
| 800       | 1.3 / 0.6                                                     | 0.27                                                                            | 0.22                                      | 0.23                                      | 0.24                                      | 0.34                                      | 0.27                                      |
| 1000      | 1.3 / 0.6                                                     | 0.27                                                                            | 0.17                                      | 0.23                                      | 0.22                                      | 0.29                                      | 0.21                                      |
| 1250      | 1.3 / 0.6                                                     | 0.30                                                                            | 0.15                                      | 0.21                                      | 0.15                                      | 0.21                                      | 0.23                                      |
| 1600      | 1.3 / 0.6                                                     | 0.39                                                                            | 0.13                                      | 0.28                                      | 0.21                                      | 0.24                                      | 0.22                                      |
| 2000      | 1.3 / 0.6                                                     | 0.51                                                                            | 0.13                                      | 0.20                                      | 0.21                                      | 0.23                                      | 0.20                                      |
| 2500      | 1.3 / 0.6                                                     | 0.61                                                                            | 0.12                                      | 0.19                                      | 0.25                                      | 0.24                                      | 0.20                                      |
| 3150      | 1.3 / 0.6                                                     | 0.58                                                                            | 0.69                                      | 0.74                                      | 0.24                                      | 0.26                                      | 0.28                                      |
